# Supplementary material
Source: HighWire-hosted journal article supplement (https://cmajopen.ca/highwire/filestream/90256/field_highwire_adjunct_files/1/open-2022-0238-coreq-checklist.pdf)
Supplement: open-2022-0238-coreq-checklist.pdf [file open-2022-0238-coreq-checklist.pdf]

# Providing Palliative and End-of-Life Care in Long-Term Care During the COVID-19 Pandemic: A Qualitative Study of Clinicians' Lived Experiences

## Reporting Guideline Checklist

### Consolidated criteria for reporting qualitative research (COREQ)

Adopted from :

Allison Tong, Peter Sainsbury, Jonathan Craig, Consolidated criteria for reporting qualitative research (COREQ): a 32-item checklist for interviews and focus groups, *International Journal for Quality in Health Care*, Volume 19, Issue 6, December 2007, Pages 349–357, <https://doi.org/10.1093/intqhc/mzm042>

| No                                             | Criteria                                 | How Requirement Met                                                                                                                                                                                                                                                                                                                                                                                                                                      | Reference in manuscript                                      |
|------------------------------------------------|------------------------------------------|----------------------------------------------------------------------------------------------------------------------------------------------------------------------------------------------------------------------------------------------------------------------------------------------------------------------------------------------------------------------------------------------------------------------------------------------------------|--------------------------------------------------------------|
| <b>Domain 1: Research team and reflexivity</b> |                                          |                                                                                                                                                                                                                                                                                                                                                                                                                                                          |                                                              |
| 1                                              | Interviewer/facilitator                  | SS, AG, and JK conducted one-on-one interviews                                                                                                                                                                                                                                                                                                                                                                                                           | Data Collection Procedures, Page 4                           |
| 2                                              | Credentials                              | See Title Page                                                                                                                                                                                                                                                                                                                                                                                                                                           | Page 1                                                       |
| 3                                              | Occupation                               | See Title Page                                                                                                                                                                                                                                                                                                                                                                                                                                           | Page 1                                                       |
| 4                                              | Gender                                   | See Title Page                                                                                                                                                                                                                                                                                                                                                                                                                                           | Page 1                                                       |
| 5                                              | Experience and training                  | See Title Page                                                                                                                                                                                                                                                                                                                                                                                                                                           | Page 1                                                       |
| 6                                              | Relationship established                 | No previous relationship with participants present                                                                                                                                                                                                                                                                                                                                                                                                       | Sampling and Recruitment, Page 4                             |
| 7                                              | Participant knowledge of the interviewer | Some participants were members of the OLTCC and work in the same sector(s) as some of the authors (ie. LTC and palliative care) but do not work together in the same setting nor have personal affiliations with each other. Participants reviewed the study information sheet including the purpose of the study and consented to participate following completely transparent procedures and no personal biases or conflicts of interests were present | Sampling and Recruitment, Data Collection Procedures, Page 4 |
| 8                                              | Interviewer characteristics              | Also see 7. Participants were aware of the scholarly and clinical expertise of the authors in the field of LTC and Palliative Care and the study purpose and question were a natural common interest between participants and interviewers                                                                                                                                                                                                               | Sampling and Recruitment, Data Collection Procedures, Page 4 |
| <b>Domain 2: study design</b>                  |                                          |                                                                                                                                                                                                                                                                                                                                                                                                                                                          |                                                              |

**Providing Palliative and End-of-Life Care in Long-Term Care During the COVID-19 Pandemic: A Qualitative Study of Clinicians' Lived Experiences**

|    |                                       |                                                                                                                                                                                                                         |                                                             |
|----|---------------------------------------|-------------------------------------------------------------------------------------------------------------------------------------------------------------------------------------------------------------------------|-------------------------------------------------------------|
| 9  | Methodological orientation and Theory | -A qualitative interpretive descriptive study<br>-Constructivist and naturalistic orientation<br>-Thematic analysis                                                                                                     | Study Design and Setting, Page 3<br>Data Analysis, Page 4-5 |
| 10 | Sampling                              | Purposive and snowball sampling                                                                                                                                                                                         | Sampling and Recruitment, Page 4                            |
| 11 | Method of approach                    | E-mail and virtual interviews                                                                                                                                                                                           | Data Collection Procedures, Page 4                          |
| 12 | Sample size                           | Twelve participants were needed to achieve data saturation given length and details of interviews                                                                                                                       | Data Collection Procedures, Page 4                          |
| 13 | Non-participation                     | No participants dropped out or refused to participate                                                                                                                                                                   | NA                                                          |
| 14 | Setting of data collection            | Virtually conducted interviews                                                                                                                                                                                          | Data Collection Procedures, Page 4                          |
| 15 | Presence of non-participants          | No non-participants were present                                                                                                                                                                                        | NA                                                          |
| 16 | Description of sample                 | Demographics reported                                                                                                                                                                                                   | See Characteristics of Sample, Page 5 and Table 1           |
| 17 | Interview guide                       | Interview guide is provided. Interviewers debriefed after each completed the initial interview and agreed with appropriateness of questions and probes. Interviewers continued to meet together and with research team. | Appendix 1<br>Data Collection Procedures, Page 4            |
| 18 | Repeat interviews                     | None were conducted                                                                                                                                                                                                     | NA                                                          |
| 19 | Audio/visual recording                | Zoom™ virtual communication platform was used. Participants were asked to keep video on at all times to allow for maximum virtual face-to-face communication                                                            | Data Collection Procedures, Page 4                          |
| 20 | Field notes                           | Yes, interviewers took field notes during the interviews to document observations and nonverbal cues. These were reviewed during consensus meetings and in data analysis.                                               | Data Collection Procedures, Page 4                          |
| 21 | Duration                              | 45 to 90 minutes given nature of questions and detailed probes                                                                                                                                                          | Data Collection Procedures, Page 4<br>Appendix 1            |

**Providing Palliative and End-of-Life Care in Long-Term Care During the COVID-19 Pandemic: A Qualitative Study of Clinicians' Lived Experiences**

|                                 |                                |                                                                                                |                                               |
|---------------------------------|--------------------------------|------------------------------------------------------------------------------------------------|-----------------------------------------------|
|                                 |                                |                                                                                                |                                               |
| 22                              | Data saturation                | Discussed in report                                                                            | Data Analysis, Page 5                         |
| 23                              | Transcripts returned           | No transcripts were returned to participants                                                   | NA                                            |
| Domain 3: analysis and findings |                                |                                                                                                |                                               |
| 24                              | Number of data coders          | Two coders (SS and AG). Process further explained in report                                    | Data Analysis, Page 4-5                       |
| 25                              | Description of the coding tree | No coding tree included, instead themes and subthemes thoroughly explained                     | See Table 2 and Results                       |
| 26                              | Derivation of themes           | Themes were not previously identified and emerged as a result of the analysis process          | Data Analysis, Page 4-5 and Table 2           |
| 27                              | Software                       | Nvivo™ 2020 used                                                                               | Data Analysis, Page 4-5                       |
| 28                              | Participant checking           | Results not shared with participants at this stage                                             | NA                                            |
| 29                              | Quotations presented           | Quotations used within text and included separately for each theme                             | See Table 2 and Results                       |
| 30                              | Data and findings consistent   | Themes and results were derived directly from the data analysis and supportive quotes provided | Data Analysis, Page 4-5<br>Table 2<br>Results |
| 31                              | Clarity of major themes        | Five major themes described<br>Clear subthemes included                                        | Table 1<br>Table 2<br>Results                 |
| 31                              | Clarity of minor themes        | Multiple subthemes were also described in details                                              | Table 1<br>Table 2<br>Results                 |
